# Supplementary material
Source: publisher figshare collection journal article supplement (https://acs.figshare.com/ndownloader/files/4177843)
Supplement: Supplementary file 1 [file 4177843]

## Supporting Information

### Temperature-Dependent Crystal Self-Assembly, Disassembly, and Reassembly Among Three Cadmium(II) Carboxylate-Phosphinates

Li-Jie Dong, Cui-Cui Zhao, Xiang Xu, Zi-Yi Du,\* Yong-Rong Xie, and Jian Zhang\*

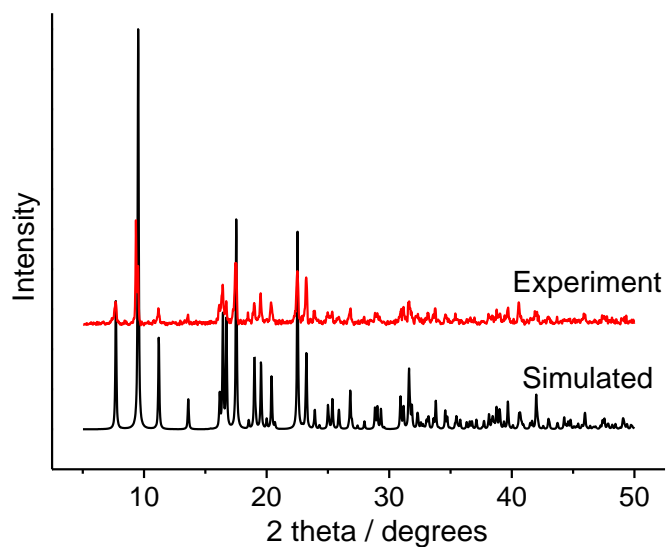

**Figure S1.** Simulated and experimental XRD powder patterns for **1**.

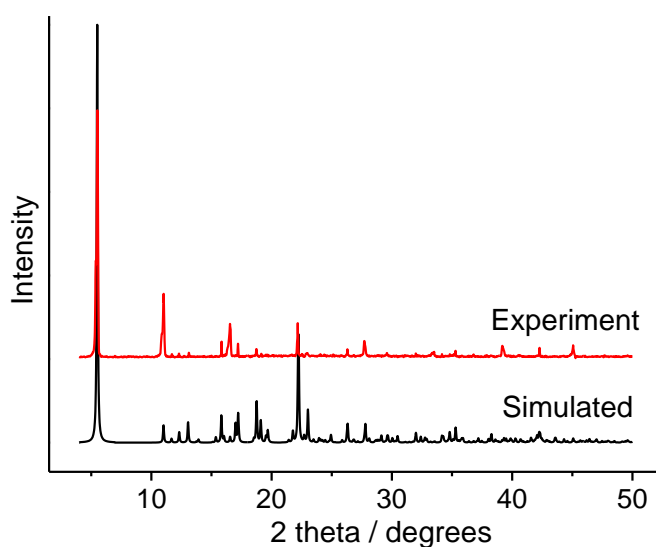

**Figure S2.** Simulated and experimental XRD powder patterns for **2**.

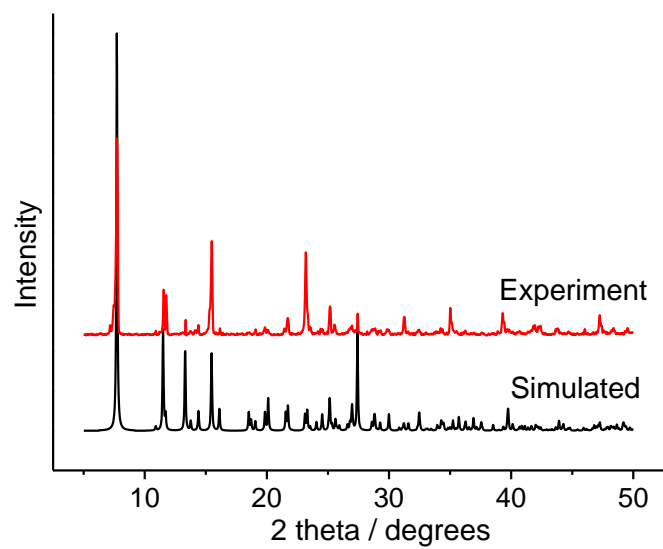

**Figure S3.** Simulated and experimental XRD powder patterns for **3**.
